# Supplementary material
Source: PubMed Central journal article supplement (PMC7104376)
Supplement: EMS85503-supplement-Suppl__Table_1.pdf [file EMS85503-supplement-Suppl__Table_1.pdf]

## Cryo-EM data collection, refinement and validation statistics

---

|                                                     |                                          |
|-----------------------------------------------------|------------------------------------------|
|                                                     | Maf1-Pol III<br>(EMD-10595, PDB<br>6TUT) |
| <hr/>                                               |                                          |
| <b>Data collection and processing</b>               |                                          |
| Magnification                                       | 130 000                                  |
| Voltage (kV)                                        | 300                                      |
| Electron exposure (e <sup>-</sup> /Å <sup>2</sup> ) | 60.5                                     |
| Defocus range (µm)                                  | -0.75 to -3.5                            |
| Pixel size (Å)                                      | 1.041                                    |
| Symmetry imposed                                    | none                                     |
| Initial particle images (no.)                       | 1 688 795                                |
| Final particle images (no.)                         | 117 442                                  |
| Map resolution (Å)                                  | 3.25                                     |
| FSC threshold                                       | 0.143                                    |
| Map resolution range (Å)                            | 2.9 to 5.0                               |
| <br>                                                |                                          |
| <b>Refinement</b>                                   |                                          |
| Initial model used (PDB code)                       | 6eu3                                     |
| Model resolution (Å)                                | 3.1                                      |
| FSC threshold                                       | 0.5                                      |
| Map sharpening <i>B</i> factor (Å <sup>2</sup> )    | -109                                     |
| Model composition                                   |                                          |
| Nonhydrogen atoms                                   | 40 653                                   |
| Protein residues                                    | 5 131                                    |
| Ligands                                             | 7                                        |
| <i>B</i> factors (Å <sup>2</sup> )                  |                                          |
| Protein                                             | 64                                       |
| Ligand                                              | 68                                       |
| R.m.s. deviations                                   |                                          |
| Bond lengths (Å)                                    | 0.01                                     |
| Bond angles (°)                                     | 1.21                                     |
| <br>                                                |                                          |
| <b>Validation</b>                                   |                                          |
| MolProbity score                                    | 1.89                                     |
| Clashscore                                          | 6.36                                     |
| Poor rotamers (%)                                   | 0.87                                     |
| Ramachandran plot                                   |                                          |
| Favored (%)                                         | 90.33                                    |
| Allowed (%)                                         | 9.55                                     |
| Disallowed (%)                                      | 0.12                                     |

---
